# Supplementary material for: Differential effects of Vav‐promoter‐driven overexpression of BCLX and BFL1 on lymphocyte survival and B cell lymphomagenesis
Source: FEBS J. 2018 Mar 24;285(8):1403–18. doi: 10.1111/febs.14426 (PMC5947286; doi:10.1111/febs.14426)
Supplement: Supplementary file 1 — Table S1. Phenotypic characterization of lymphomas arising in Eμ‐MYC TG mice. Table S2. Phenotypic characterization of lymphomas arising in Eμ‐MYC/Vav‐BFL1 DT mice. Table S3. Phenotypic characterization of lymphomas arising in Eμ‐MYC/Vav‐BCLX DT mice. [file FEBS-285-1403-s001.pdf]

Archive with 1 entries (1 files):
- febs14426-sup-0001-TableS1-3.pdf
