# Supplementary material for: Differential effects of Vav‐promoter‐driven overexpression of BCLX and BFL1 on lymphocyte survival and B cell lymphomagenesis
Source: FEBS J. 2018 Mar 24;285(8):1403–18. doi: 10.1111/febs.14426 (PMC5947286; doi:10.1111/febs.14426)
Supplement: Supplementary file 1 — Table S1. Phenotypic characterization of lymphomas arising in Eμ‐MYC TG mice. Table S2. Phenotypic characterization of lymphomas arising in Eμ‐MYC/Vav‐BFL1 DT mice. Table S3. Phenotypic characterization of lymphomas arising in Eμ‐MYC/Vav‐BCLX DT mice. [file FEBS-285-1403-s001.pdf › febs14426-sup-0001-TableS1-3.pdf]

# **Differential effects of Vav-promoter-driven overexpression of BCLX and BFL1 on lymphocyte survival and B cell lymphomagenesis**

Selma Tuzlak, Manuel D. Haschka, Anna-Maria Mokina, Thomas Rüllicke, Suzanne Cory, Verena Labi and Andreas Villunger

DOI: 10.1111/febs.14426

**Table S1. Phenotypic characterization of lymphomas arising in *Eμ-MYC* TG mice.**

Diseased *Eμ-Myc* TG mice were bled from the submandibular vein and bone marrow (BM), spleen, thymus, mesenteric lymph nodes (mLN) and peripheral lymph nodes (pLN, consisting of mandibular, axillary and inguinal LN) were isolated after sacrifice. Single cell suspensions were analyzed by flow cytometry for the expression of B220, CD4, CD19, and IgM. Total CD19<sup>+</sup>B220<sup>+</sup>CD4<sup>+</sup>, and CD19<sup>+</sup>B220<sup>+</sup>CD4<sup>-</sup> lymphoma cells were quantified. CD19<sup>+</sup>B220<sup>+</sup>CD4<sup>-</sup> lymphoma cells were further characterized into IgM<sup>+</sup> and IgM<sup>-</sup> cells and thereby the phenotype of the lymphoma in the respective organ was determined. Mixed phenotype refers to the presence of both CD19<sup>+</sup>B220<sup>+</sup>IgM<sup>+</sup> and CD19<sup>+</sup>B220<sup>+</sup>IgM<sup>-</sup> populations. The overall phenotype refers to the cumulative results of all organs from a respective mouse and is depicted in Fig. 5E. Furthermore, spleen weights, thymus weights, white blood cell (WBC) counts and tumor onset are indicated.

Tuzlak et al. Table S1

| genotype | mouse # | organ  | % total CD19-B220+CD4+ | % B cells (CD19+B220+) | % IgM+ of B cells | % IgM- of B cells | phenotype | overall phenotype | spleen weight [g] | thymus weight [g] | WBC count [10^3/m m^3] | tumor onset [d] |
|----------|---------|--------|------------------------|------------------------|-------------------|-------------------|-----------|-------------------|-------------------|-------------------|------------------------|-----------------|
| MYC      | A2      | BM     | 0,1                    | 55,3                   | 0,25              | 99,5              | IgM-      | IgM-              | 0,42              | 0,15              | 44,7                   | 91              |
|          |         | blood  | 0,031                  | 51,8                   | 5,11              | 94,8              | IgM-      |                   |                   |                   |                        |                 |
|          |         | spleen | 0,042                  | 49,8                   | 5,27              | 94,4              | IgM-      |                   |                   |                   |                        |                 |
|          |         | thymus | 0                      | 32,1                   | 0,49              | 99,5              | IgM-      |                   |                   |                   |                        |                 |
|          |         | mLN    | 0,045                  | 84,5                   | 2,02              | 98                | IgM-      |                   |                   |                   |                        |                 |
|          |         | pLN    | 0,019                  | 77,9                   | 1,29              | 98,7              | IgM-      |                   |                   |                   |                        |                 |
|          | A15     | BM     | 0,016                  | 77,1                   | 0,041             | 100               | IgM-      | IgM-              | 0,37              | 0,08              | 10,1                   | 101             |
|          |         | blood  | 9,79E-03               | 41,5                   | 0,19              | 99,8              | IgM-      |                   |                   |                   |                        |                 |
|          |         | spleen | 8,16E-03               | 31,7                   | 0,19              | 99,8              | IgM-      |                   |                   |                   |                        |                 |
|          |         | thymus | 0,11                   | 43,2                   | 0,17              | 99,8              | IgM-      |                   |                   |                   |                        |                 |
|          |         | mLN    | 0,018                  | 71,6                   | 0,05              | 99,9              | IgM-      |                   |                   |                   |                        |                 |
|          |         | pLN    | 9,69E-03               | 77,7                   | 0,081             | 99,9              | IgM-      |                   |                   |                   |                        |                 |
|          | A17     | BM     | 0,45                   | 33,9                   | 0,42              | 99,6              | IgM-      | IgM-              | 0,29              | 0,07              | 9,8                    | 129             |
|          |         | blood  | 0,01                   | 58,4                   | 4,09              | 95,8              | IgM-      |                   |                   |                   |                        |                 |
|          |         | spleen | 0,041                  | 47,2                   | 5,7               | 94,1              | IgM-      |                   |                   |                   |                        |                 |
|          |         | thymus | 0,041                  | 2,39                   | 5,89              | 93,4              | IgM-      |                   |                   |                   |                        |                 |
|          |         | mLN    | 0,064                  | 70,1                   | 7,84              | 92                | IgM-      |                   |                   |                   |                        |                 |
|          |         | pLN    | 0,11                   | 70,3                   | 8,26              | 91,6              | IgM-      |                   |                   |                   |                        |                 |
|          | A34     | BM     | 1,24                   | 55,7                   | 13,4              | 85,4              | IgM-      | IgM-              | 0,09              | 0,12              | 6,2                    | 42              |
|          |         | blood  | 5,04E-03               | 21,8                   | 24,8              | 73,7              | IgM-      |                   |                   |                   |                        |                 |
|          |         | spleen | 0,17                   | 29,7                   | 32,5              | 65,8              | IgM-      |                   |                   |                   |                        |                 |
|          |         | thymus | 0,36                   | 78,9                   | 3,17              | 96,2              | IgM-      |                   |                   |                   |                        |                 |
|          |         | mLN    | 0,26                   | 92,4                   | 3,5               | 95,9              | IgM-      |                   |                   |                   |                        |                 |
|          |         | pLN    | 0                      | 15                     | 20,5              | 79,5              | IgM-      |                   |                   |                   |                        |                 |
|          | A47     | BM     | 0,33                   | 39,5                   | 22,8              | 74,5              | IgM-      | mixed             | 0,56              | 0,24              | 44,5                   | 53              |
|          |         | blood  | 0,01                   | 37,6                   | 17,6              | 80,6              | IgM-      |                   |                   |                   |                        |                 |
|          |         | spleen | 0,013                  | 56,6                   | 22,1              | 77,9              | IgM-      |                   |                   |                   |                        |                 |
|          |         | thymus | 0,028                  | 40,9                   | 44                | 56                | mixed     |                   |                   |                   |                        |                 |
|          |         | mLN    | 0,035                  | 77,3                   | 36,9              | 61,5              | mixed     |                   |                   |                   |                        |                 |
|          |         | pLN    | 0,1                    | 80,7                   | 39,8              | 56,7              | mixed     |                   |                   |                   |                        |                 |
|          | A21     | BM     | 0,23                   | 42,5                   | 0,96              | 98,9              | IgM-      | IgM-              | 0,2               | 0,09              | 13,8                   | 171             |
|          |         | blood  | 3,13E-03               | 28,7                   | 9,92              | 89,6              | IgM-      |                   |                   |                   |                        |                 |
|          |         | mLN    | 0,058                  | 82,6                   | 2,21              | 97,6              | IgM-      |                   |                   |                   |                        |                 |
|          |         | pLN    | 0,13                   | 83,3                   | 3,56              | 96,2              | IgM-      |                   |                   |                   |                        |                 |
|          |         | spleen | 0,055                  | 47,8                   | 7,02              | 92,1              | IgM-      |                   |                   |                   |                        |                 |
|          |         | thymus | 0,034                  | 4,08                   | 2,29              | 97,4              | IgM-      |                   |                   |                   |                        |                 |
|          | A28     | BM     | 0,048                  | 75,4                   | 4,32              | 94,8              | IgM-      | IgM-              | 0,73              | 0,07              | 13,2                   | 139             |
|          |         | blood  | 0,013                  | 37,2                   | 21,9              | 77,1              | IgM-      |                   |                   |                   |                        |                 |
|          |         | mLN    | 0,034                  | 83,7                   | 11,8              | 87,6              | IgM-      |                   |                   |                   |                        |                 |
|          |         | pLN    | 0,041                  | 81,2                   | 10,5              | 88,9              | IgM-      |                   |                   |                   |                        |                 |
|          |         | spleen | 0,084                  | 47,4                   | 29,9              | 69,3              | IgM-      |                   |                   |                   |                        |                 |
|          |         | thymus | 0,069                  | 24,2                   | 17                | 82,1              | IgM-      |                   |                   |                   |                        |                 |
|          | A37     | BM     | 0                      | 92,9                   | 0,23              | 99,5              | IgM-      | IgM-              | 0,44              | 0,15              | 13,2                   | 134             |
|          |         | blood  | 0                      | 39,7                   | 6,49              | 93,2              | IgM-      |                   |                   |                   |                        |                 |
|          |         | mLN    | 0,1                    | 65,8                   | 7,83              | 91,7              | IgM-      |                   |                   |                   |                        |                 |
|          |         | pLN    | 0,11                   | 57,8                   | 4,1               | 95,5              | IgM-      |                   |                   |                   |                        |                 |
|          |         | spleen | 0,11                   | 36,2                   | 6,88              | 92,7              | IgM-      |                   |                   |                   |                        |                 |
|          |         | thymus | 0,11                   | 75,7                   | 1,1               | 98,5              | IgM-      |                   |                   |                   |                        |                 |
|          | B76     | BM     | 0,4                    | 48,3                   | 0,45              | 99,5              | IgM-      | IgM-              | 0,74              | 0,26              | 77,8                   | 73              |
|          |         | blood  | 0,025                  | 67,1                   | 3,17              | 96,8              | IgM-      |                   |                   |                   |                        |                 |
|          |         | spleen | 6,00E-03               | 31,9                   | 3,61              | 96,4              | IgM-      |                   |                   |                   |                        |                 |
|          |         | thymus | 0,032                  | 42,6                   | 0,34              | 99,7              | IgM-      |                   |                   |                   |                        |                 |
|          |         | mLN    | 0,1                    | 75,3                   | 3,1               | 97,1              | IgM-      |                   |                   |                   |                        |                 |
|          |         | pLN    | 0,041                  | 66                     | 2,88              | 97,3              | IgM-      |                   |                   |                   |                        |                 |
|          | B74     | BM     | 0,5                    | 47,7                   | 0,77              | 99,2              | IgM-      | IgM-              | 0,48              | 0,24              | 96,5                   | 80              |
|          |         | blood  | 0,058                  | 77,3                   | 3,07              | 96,8              | IgM-      |                   |                   |                   |                        |                 |
|          |         | spleen | 0,027                  | 44,4                   | 4,29              | 95,9              | IgM-      |                   |                   |                   |                        |                 |
|          |         | thymus | 0,06                   | 74                     | 0,17              | 99,8              | IgM-      |                   |                   |                   |                        |                 |
|          |         | mLN    | 0,044                  | 80,3                   | 3,6               | 96,3              | IgM-      |                   |                   |                   |                        |                 |
|          |         | pLN    | 0,12                   | 67,2                   | 5,77              | 94,1              | IgM-      |                   |                   |                   |                        |                 |

**Table S2. Phenotypic characterization of lymphomas arising in *Eμ-MYC/Vav-BFL1* DT mice.** Diseased *Eμ-Myc/Vav-BFL1* DT mice were bled from the submandibular vein and bone marrow (BM), spleen, thymus, mesenteric lymph nodes (mLN) and peripheral lymph nodes (pLN, consisting of mandibular, axillary and inguinal LN) were isolated after sacrifice. Single cell suspensions were analyzed by flow cytometry for the expression of B220, CD4, CD19, and IgM. Total CD19<sup>+</sup>B220<sup>+</sup>CD4<sup>+</sup>, and CD19<sup>+</sup>B220<sup>+</sup>CD4<sup>-</sup> lymphoma cells were quantified. CD19<sup>+</sup>B220<sup>+</sup>CD4<sup>-</sup> lymphoma cells were further characterized into IgM<sup>+</sup> and IgM<sup>-</sup> cells and thereby the phenotype of the lymphoma in the respective organ was determined. Mixed phenotype refers to the presence of both CD19<sup>+</sup>B220<sup>+</sup>IgM<sup>+</sup> and CD19<sup>+</sup>B220<sup>+</sup>IgM<sup>-</sup> populations. The overall phenotype refers to the cumulative results of all organs from a respective mouse and is depicted in Fig. 5E. Furthermore, spleen weights, thymus weights, white blood cell (WBC) counts and tumor onset are indicated.

Tuzlak et al. Table S2

| genotype | mouse # | organ  | % total CD19-<br>B220+CD4+ | % B cells<br>(CD19+B220+) | % IgM+ of<br>B cells | % IgM- of B<br>cells | phenotype | overall<br>phenotype | spleen<br>weight<br>[g] | thymus<br>weight [g] | WBC<br>count<br>[10 <sup>3</sup> /m<br>m <sup>3</sup> ] | tumor<br>onset [d] |
|----------|---------|--------|----------------------------|---------------------------|----------------------|----------------------|-----------|----------------------|-------------------------|----------------------|---------------------------------------------------------|--------------------|
| MYC/BFL1 | A23     | BM     | 4,77                       | 47,1                      | 4,51                 | 95,4                 | IgM-      | IgM-<br>early CD4    | 0,23                    | 0,37                 | 72,6                                                    | 49                 |
|          |         | blood  | 1,89                       | 76                        | 9,25                 | 90,6                 | IgM-      |                      |                         |                      |                                                         |                    |
|          |         | spleen | 0                          | 53,8                      | 13,3                 | 86,5                 | IgM-      |                      |                         |                      |                                                         |                    |
|          |         | thymus | <b>37,2</b>                | 40,6                      | 2,19                 | 97,7                 | IgM-      |                      |                         |                      |                                                         |                    |
|          |         | mLN    | 0,35                       | 94,2                      | 0,32                 | 99,6                 | IgM-      |                      |                         |                      |                                                         |                    |
|          |         | pLN    | 0                          | 61                        | 9,24                 | 90,5                 | IgM-      |                      |                         |                      |                                                         |                    |
|          | A40     | BM     | 0,032                      | 85,8                      | 1,76                 | 98,2                 | IgM-      | IgM-                 | 0,37                    | 0,34                 | 138                                                     | 51                 |
|          |         | blood  | 8,89E-03                   | 55,6                      | 5,05                 | 94,9                 | IgM-      |                      |                         |                      |                                                         |                    |
|          |         | spleen | 6,35E-03                   | 63                        | 7,97                 | 91,9                 | IgM-      |                      |                         |                      |                                                         |                    |
|          |         | thymus | 0,024                      | 91,8                      | 18,3                 | 81,4                 | IgM-      |                      |                         |                      |                                                         |                    |
|          |         | mLN    | 0,021                      | 63                        | 1,64                 | 98,3                 | IgM-      |                      |                         |                      |                                                         |                    |
|          |         | pLN    | 0,15                       | 74,1                      | 12,9                 | 87                   | IgM-      |                      |                         |                      |                                                         |                    |
|          | A52     | BM     | 3,32                       | 58,1                      | 29,8                 | 69,9                 | mixed     | mixed<br>early CD4   | 0,38                    | 0,34                 | 92                                                      | 53                 |
|          |         | blood  | 0,39                       | 81,4                      | 58,3                 | 41,5                 | mixed     |                      |                         |                      |                                                         |                    |
|          |         | spleen | 0,31                       | 67,2                      | 74,6                 | 24,3                 | mixed     |                      |                         |                      |                                                         |                    |
|          |         | thymus | <b>34,2</b>                | 44,4                      | 29,4                 | 69,9                 | mixed     |                      |                         |                      |                                                         |                    |
|          |         | mLN    | <b>11,8</b>                | 58,1                      | 46,6                 | 52,1                 | mixed     |                      |                         |                      |                                                         |                    |
|          |         | pLN    | 9,4                        | 70                        | 39,7                 | 58,6                 | mixed     |                      |                         |                      |                                                         |                    |
|          | A45     | spleen | 0,015                      | 36,6                      | 33,7                 | 65,3                 | mixed     | mixed                | 0,43                    | 0,85                 | 382,5                                                   | 53                 |
|          |         | thymus | 0,024                      | 93,6                      | 31,8                 | 65,8                 | mixed     |                      |                         |                      |                                                         |                    |
|          |         | pLN    | 0,063                      | 84                        | 12,6                 | 86,2                 | IgM-      |                      |                         |                      |                                                         |                    |
|          |         | BM     | 0,28                       | 63,4                      | 31,1                 | 67,8                 | mixed     |                      |                         |                      |                                                         |                    |
|          |         | blood  | 0,025                      | 40,5                      | 31,8                 | 68,1                 | mixed     |                      |                         |                      |                                                         |                    |
|          | A24     | BM     | 0,54                       | 56,8                      | 0,82                 | 99,1                 | IgM-      | IgM-<br>early CD4    | 0,53                    | 0,29                 | 363                                                     | 55                 |
|          |         | blood  | 0,036                      | 27,6                      | 0,77                 | 99,2                 | IgM-      |                      |                         |                      |                                                         |                    |
|          |         | spleen | 0,021                      | 37                        | 1,45                 | 98,5                 | IgM-      |                      |                         |                      |                                                         |                    |
|          |         | thymus | <b>11</b>                  | 53,7                      | 0,31                 | 99,7                 | IgM-      |                      |                         |                      |                                                         |                    |
|          |         | mLN    | 0,78                       | 82,4                      | 1,12                 | 98,8                 | IgM-      |                      |                         |                      |                                                         |                    |
|          |         | pLN    | 0,51                       | 81,4                      | 0,6                  | 99,4                 | IgM-      |                      |                         |                      |                                                         |                    |
|          | A38     | BM     | 1,07                       | 63,4                      | 4,23                 | 95,5                 | IgM-      | IgM-<br>early CD4    | 0,12                    | 0,18                 | 4,5                                                     | 37                 |
|          |         | blood  | 0,098                      | 37,1                      | 20,5                 | 79,1                 | IgM-      |                      |                         |                      |                                                         |                    |
|          |         | spleen | 0,19                       | 28,1                      | 22,3                 | 69,6                 | IgM-      |                      |                         |                      |                                                         |                    |
|          |         | thymus | <b>25,3</b>                | 45,8                      | 6,04                 | 92,7                 | IgM-      |                      |                         |                      |                                                         |                    |
|          |         | mLN    | 0,47                       | 80,8                      | 1,43                 | 98,2                 | IgM-      |                      |                         |                      |                                                         |                    |
|          |         | pLN    | 1,59                       | 87,2                      | 6,02                 | 92,1                 | IgM-      |                      |                         |                      |                                                         |                    |
|          | A48     | BM     | 1,32                       | 59,9                      | 2,59                 | 97,1                 | IgM-      | IgM-<br>early CD4    | 0,49                    | 0,29                 | 194                                                     | 39                 |
|          |         | blood  | 0,066                      | 34,2                      | 8,06                 | 91,5                 | IgM-      |                      |                         |                      |                                                         |                    |
|          |         | thymus | <b>10,2</b>                | 67,8                      | 7,17                 | 91,6                 | IgM-      |                      |                         |                      |                                                         |                    |
|          |         | mLN    | 0,97                       | 85,3                      | 9,27                 | 89                   | IgM-      |                      |                         |                      |                                                         |                    |
|          |         | pLN    | 2,33                       | 84,1                      | 11,9                 | 86,8                 | IgM-      |                      |                         |                      |                                                         |                    |
|          | A56     | BM     | 0,3                        | 68,2                      | 0,45                 | 99,5                 | IgM-      | IgM-<br>early CD4    | 0,44                    | 0,31                 | 127,5                                                   | 47                 |
|          |         | blood  | 0,038                      | 52,2                      | 1,49                 | 98,5                 | IgM-      |                      |                         |                      |                                                         |                    |
|          |         | spleen | 0,036                      | 51,4                      | 3,69                 | 96,2                 | IgM-      |                      |                         |                      |                                                         |                    |
|          |         | thymus | <b>8,01</b>                | 82,1                      | 0,49                 | 99,5                 | IgM-      |                      |                         |                      |                                                         |                    |
|          |         | mLN    | 1,29                       | 81,4                      | 1,77                 | 98,2                 | IgM-      |                      |                         |                      |                                                         |                    |
|          |         | pLN    | 2,39                       | 76,4                      | 3,02                 | 96,9                 | IgM-      |                      |                         |                      |                                                         |                    |
|          | A8      | BM     | 2,94E-03                   | 67,9                      | 88,7                 | 10,8                 | IgM+      | IgM+                 | 0,24                    | 0,45                 | 79,5                                                    | 61                 |
|          |         | spleen | 0                          | 54,9                      | 96,2                 | 1,96                 | IgM+      |                      |                         |                      |                                                         |                    |
|          |         | thymus | 0                          | 97,1                      | 96,9                 | 2,48                 | IgM+      |                      |                         |                      |                                                         |                    |
|          |         | mLN    | 0                          | 87                        | 51,9                 | 45                   | IgM+      |                      |                         |                      |                                                         |                    |
|          |         | pLN    | 0                          | 96,1                      | 97,2                 | 1,73                 | IgM+      |                      |                         |                      |                                                         |                    |
|          | A9      | BM     | 1,81                       | 69,8                      | 0,54                 | 99,4                 | IgM-      | IgM-<br>early CD4    | 0,67                    | 0,32                 | 38                                                      | 61                 |
|          |         | spleen | 0,39                       | 82,6                      | 2,35                 | 97,3                 | IgM-      |                      |                         |                      |                                                         |                    |
|          |         | thymus | <b>52,1</b>                | 30                        | 3,22                 | 96,3                 | IgM-      |                      |                         |                      |                                                         |                    |
|          |         | mLN    | <b>21,6</b>                | 48,2                      | 6,18                 | 92,9                 | IgM-      |                      |                         |                      |                                                         |                    |
|          |         | pLN    | 1,13                       | 94,1                      | 0,37                 | 99,5                 | IgM-      |                      |                         |                      |                                                         |                    |
|          | A13     | BM     | 0,098                      | 79                        | 11,2                 | 88,3                 | IgM-      | IgM-<br>early CD4    | 0,17                    | 0,17                 | 17,6                                                    | 62                 |
|          |         | spleen | 0,057                      | 70,3                      | 28,3                 | 71,4                 | IgM-      |                      |                         |                      |                                                         |                    |
|          |         | thymus | <b>6,04</b>                | 88,3                      | 3,33                 | 96,5                 | IgM-      |                      |                         |                      |                                                         |                    |
|          |         | mLN    | 0,91                       | 89,8                      | 4,87                 | 95                   | IgM-      |                      |                         |                      |                                                         |                    |
|          |         | pLN    | 2,99                       | 88,8                      | 6,7                  | 93                   | IgM-      |                      |                         |                      |                                                         |                    |

**Table S3. Phenotypic characterization of lymphomas arising in *Eμ-MYC/Vav-BCLX* DT**

**mice** Diseased *Eμ-Myc/Vav-BCLX* DT mice were bled from the submandibular vein and bone marrow (BM), spleen, thymus, mesenteric lymph nodes (mLN) and peripheral lymph nodes (pLN, consisting of mandibular, axillary and inguinal LN) were isolated after sacrifice. Single cell suspensions were analyzed by flow cytometry for the expression of B220, CD4, CD19, and IgM. Total  $CD19^+B220^+CD4^+$ , and  $CD19^+B220^+CD4^-$  lymphoma cells were quantified.  $CD19^+B220^+CD4^-$  lymphoma cells were further characterized into  $IgM^+$  and  $IgM^-$  cells and thereby the phenotype of the lymphoma in the respective organ was determined. Mixed phenotype refers to the presence of both  $CD19^+B220^+IgM^+$  and  $CD19^+B220^+IgM^-$  populations. The overall phenotype refers to the cumulative results of all organs from a respective mouse and is depicted in Fig. 5E. Furthermore, spleen weights, thymus weights, white blood cell (WBC) counts and tumor onset are indicated.

Tuzlak et al. Table S3

| genotype | mouse # | organ  | % total CD19-B220+CD4+ | % B cells (CD19+B220+) | % IgM+ of B cells | % IgM- of B cells | phenotype | overall phenotype | spleen weight [g] | thymus weight [g] | WBC count [10^3/mm^3] | tumor onset [d] |
|----------|---------|--------|------------------------|------------------------|-------------------|-------------------|-----------|-------------------|-------------------|-------------------|-----------------------|-----------------|
| MYC/BCLX | A70     | BM     | 1,01                   | 45                     | 45,9              | 53,2              | mixed     | mixed             | 0,49              | 0,51              | 122                   | 58              |
|          |         | blood  | 0,019                  | 64                     | 73                | 26                | IgM+      |                   |                   |                   |                       |                 |
|          |         | spleen | 1,70E-02               | 49,5                   | 81,6              | 15,8              | IgM+      |                   |                   |                   |                       |                 |
|          |         | thymus | 0,07                   | 55,4                   | 3,13              | 95,8              | IgM-      |                   |                   |                   |                       |                 |
|          |         | mLN    | 0,32                   | 55,2                   | 50,1              | 46                | mixed     |                   |                   |                   |                       |                 |
|          | A74     | pLN    | 0,23                   | 56,1                   | 36,5              | 60,2              | mixed     | IgM-              | 0,62              | 0,33              | 74,5                  | 58              |
|          |         | BM     | 0,49                   | 52,3                   | 1,37              | 98,4              | IgM-      |                   |                   |                   |                       |                 |
|          |         | blood  | 0,015                  | 73,7                   | 4,45              | 95,2              | IgM-      |                   |                   |                   |                       |                 |
|          |         | spleen | 1,50E-02               | 47,3                   | 4,45              | 94,8              | IgM-      |                   |                   |                   |                       |                 |
|          |         | thymus | 0,056                  | 50,6                   | 0,9               | 98,9              | IgM-      |                   |                   |                   |                       |                 |
|          | A75     | mLN    | 0,26                   | 63,1                   | 6,74              | 91,8              | IgM-      | IgM+              | 0,39              | 0,55              | 145                   | 58              |
|          |         | pLN    | 0,035                  | 62,3                   | 2,68              | 96,7              | IgM-      |                   |                   |                   |                       |                 |
|          |         | BM     | 0,25                   | 53,4                   | 95,1              | 4,64              | IgM+      |                   |                   |                   |                       |                 |
|          |         | blood  | 0,01                   | 80,7                   | 97                | 2,73              | IgM+      |                   |                   |                   |                       |                 |
|          |         | spleen | 2,65E-03               | 43                     | 96                | 2,94              | IgM+      |                   |                   |                   |                       |                 |
|          | A55     | thymus | 2,10E-02               | 55,9                   | 84,5              | 12                | IgM+      | mixed early CD4   | 0,21              | 0,04              | 33,1                  | 119             |
|          |         | mLN    | 0,17                   | 44,1                   | 77,9              | 20,3              | IgM+      |                   |                   |                   |                       |                 |
|          |         | pLN    | 0,2                    | 51,7                   | 81,4              | 16,7              | IgM+      |                   |                   |                   |                       |                 |
|          |         | BM     | 0,53                   | 45,5                   | 18,8              | 80,8              | IgM-      |                   |                   |                   |                       |                 |
|          |         | blood  | 0,083                  | 70,4                   | 83,9              | 13,8              | IgM+      |                   |                   |                   |                       |                 |
|          | A7      | spleen | 0,18                   | 52,6                   | 71                | 23,2              | IgM+      | IgM+ early CD4    | 0,7               | 0,84              | 497                   | 72              |
|          |         | thymus | 15,7                   | 2,21                   | 61,3              | 37,3              | mixed     |                   |                   |                   |                       |                 |
|          |         | mLN    | 0,81                   | 65,6                   | 27                | 66,1              | IgM-      |                   |                   |                   |                       |                 |
|          |         | pLN    | 0,21                   | 54,4                   | 8,19              | 90,6              | IgM-      |                   |                   |                   |                       |                 |
|          |         | BM     | 3,13                   | 30,8                   | 76,8              | 22,4              | IgM+      |                   |                   |                   |                       |                 |
|          | A8      | blood  | 2,54                   | 78,9                   | 27,4              | 71,7              | IgM+      | mixed             | 0,48              | 0,21              | 78                    | 78              |
|          |         | spleen | 0,66                   | 58,4                   | 97,3              | 2,74              | IgM+      |                   |                   |                   |                       |                 |
|          |         | thymus | 8,84                   | 87,8                   | 91,9              | 8,23              | IgM+      |                   |                   |                   |                       |                 |
|          |         | mLN    | 20,1                   | 36,8                   | 79,1              | 17                | IgM+      |                   |                   |                   |                       |                 |
|          |         | pLN    | 12,4                   | 46,5                   | 82,3              | 16,6              | IgM+      |                   |                   |                   |                       |                 |
|          | A52     | BM     | 0,61                   | 52,4                   | 45,4              | 54,3              | mixed     | IgM+              | 0,38              | 0,99              | 210,5                 | 62              |
|          |         | blood  | 0,026                  | 62,5                   | 74,5              | 26,1              | IgM+      |                   |                   |                   |                       |                 |
|          |         | spleen | 0,024                  | 46,2                   | 77,1              | 22,2              | IgM+      |                   |                   |                   |                       |                 |
|          |         | thymus | 0,48                   | 76,4                   | 92,7              | 6,66              | IgM+      |                   |                   |                   |                       |                 |
|          |         | mLN    | 0,15                   | 60,7                   | 27,4              | 71,9              | IgM-      |                   |                   |                   |                       |                 |
|          | A50     | pLN    | 0,12                   | 69,1                   | 24,7              | 74,6              | IgM-      | IgM-              | 0,36              | 0,11              | 29                    | 62              |
|          |         | BM     | 0,25                   | 44,3                   | 94,4              | 5,34              | IgM+      |                   |                   |                   |                       |                 |
|          |         | blood  | 9,45E-03               | 86,1                   | 33,3              | 64,5              | IgM+      |                   |                   |                   |                       |                 |
|          |         | spleen | 9,10E-03               | 34,6                   | 91,6              | 8,26              | IgM+      |                   |                   |                   |                       |                 |
|          |         | thymus | 4,88E-03               | 93,2                   | 95,5              | 4,25              | IgM+      |                   |                   |                   |                       |                 |
|          | A59     | mLN    | 0,16                   | 39,6                   | 77,3              | 21,6              | IgM+      | IgM+              | 0,64              | 0,62              | 361,5                 | 124             |
|          |         | pLN    | 0,16                   | 57,2                   | 91,9              | 7,68              | IgM+      |                   |                   |                   |                       |                 |
|          |         | BM     | 0,87                   | 57,9                   | 0,73              | 99,2              | IgM-      |                   |                   |                   |                       |                 |
|          |         | blood  | 0,05                   | 72,3                   | 14,3              | 84,4              | IgM-      |                   |                   |                   |                       |                 |
|          |         | spleen | 0,068                  | 62,1                   | 10,8              | 88,6              | IgM-      |                   |                   |                   |                       |                 |
|          | A59     | thymus | 0,15                   | 2,12                   | 4,82              | 94,9              | no tumor  | IgM+              | 0,64              | 0,62              | 361,5                 | 124             |
|          |         | mLN    | 0,14                   | 65,4                   | 12,2              | 87,8              | IgM-      |                   |                   |                   |                       |                 |
|          |         | pLN    | 0,15                   | 61,5                   | 10,7              | 89,7              | IgM-      |                   |                   |                   |                       |                 |
|          |         | BM     | 0,28                   | 66,9                   | 97,5              | 2,3               | IgM+      |                   |                   |                   |                       |                 |
|          |         | blood  | 0,042                  | 92,1                   | 99,2              | 0,73              | IgM+      |                   |                   |                   |                       |                 |
|          | A59     | spleen | 0,028                  | 70,3                   | 97,8              | 1,65              | IgM+      | mixed             | 0,64              | 0,62              | 361,5                 | 124             |
|          |         | thymus | 2,44                   | 90,2                   | 95,6              | 3,58              | IgM+      |                   |                   |                   |                       |                 |
|          |         | mLN    | 2,14                   | 79,9                   | 56,4              | 41                | mixed     |                   |                   |                   |                       |                 |
|          |         | pLN    | 0,71                   | 88,2                   | 63,1              | 31,5              | mixed     |                   |                   |                   |                       |                 |
